# Supplementary material for: Longitudinal data in peripheral blood confirm that PM20D1 is a quantitative trait locus (QTL) for Alzheimer’s disease and implicate its dynamic role in disease progression
Source: Clin Epigenetics. 2020 Dec 9;12:189. doi: 10.1186/s13148-020-00984-5 (PMC7724832; doi:10.1186/s13148-020-00984-5)
Supplement: Supplementary file 1 — Additional file 1. Table S1: The differentially methylated regions (DMRs) as detected by the comparisons among control, MCI and AD. Each tab shows the significant regions as ranked by the p values for each comparison. [file 13148_2020_984_MOESM1_ESM.xlsx]

## Sheet: AD vs CN
	seqnames	start	end	width	strand	value	area	cluster	indexStart	indexEnd	L	clusterL	p.value	fwer	p.valueArea	fwerArea
DMR_1	chr1	205818668	205819609	941	*	-0.475512	5.23063	32597	10494	10504	11	11	7.47686e-06	0.004	0.000216829	0.112
DMR_2	chr5	135415693	135416613	920	*	0.218517	2.84072	320430	96447	96459	13	13	0.000418704	0.208	0.00181688	0.652
DMR_3	chr6	28601271	28601519	248	*	-0.244508	2.68959	333541	99929	99939	11	11	0.000538334	0.252	0.00207857	0.704
DMR_4	chr10	124638756	124639260	504	*	-0.201571	2.62043	57469	16540	16552	13	13	0.000590672	0.288	0.00218324	0.716
DMR_5	chr6	49681178	49681851	673	*	-0.19879	2.38548	338929	106302	106313	12	12	0.000889746	0.376	0.00285616	0.804
DMR_6	chr12	130821962	130822818	856	*	-0.225436	2.25436	102986	31935	31944	10	10	0.00103181	0.436	0.00327486	0.844
DMR_7	chr6	31148332	31148666	334	*	-0.147476	2.06467	334436	101946	101959	14	14	0.00103928	0.444	0.00428424	0.904
DMR_8	chr17	33759512	33760527	1015	*	0.1685	2.19049	167333	51848	51860	13	16	0.00114396	0.468	0.00355898	0.872
DMR_9	chr8	101348359	101348747	388	*	0.231442	1.85154	385044	117610	117617	8	9	0.00112153	0.484	0.0059142	0.968
DMR_10	chr1	223566268	223567002	734	*	-0.216741	2.16741	35152	11084	11093	10	11	0.00123368	0.488	0.00364871	0.876
DMR_11	chr11	2890190	2890725	535	*	-0.0902735	1.98602	61803	18001	18022	22	30	0.00125611	0.528	0.00480014	0.932
DMR_12	chr18	6414958	6414978	20	*	-0.224363	0.897454	180700	56746	56749	4	9	0.00154023	0.556	0.0392012	1
DMR_13	chr6	31650735	31651291	556	*	-0.123594	1.8539	334614	102417	102431	15	17	0.00156266	0.584	0.00589176	0.968
DMR_14	chr1	75198211	75199177	966	*	-0.130464	1.8265	17959	5265	5278	14	14	0.0017122	0.616	0.00616093	0.968
DMR_15	chr20	36148860	36149455	595	*	-0.0867672	1.47504	242870	75398	75414	17	41	0.00186174	0.676	0.0110059	0.988
DMR_16	chr5	8457356	8458089	733	*	-0.201441	1.81297	308300	93065	93073	9	10	0.00207857	0.692	0.00625813	0.968
DMR_17	chr5	178986291	178986906	615	*	-0.138952	1.80637	327950	98604	98616	13	13	0.00237016	0.716	0.00634785	0.968
DMR_18	chr10	49812686	49813208	522	*	-0.199368	1.19621	46400	13444	13449	6	11	0.00272905	0.752	0.0192679	1
DMR_19	chr20	2187540	2187844	304	*	-0.194679	0.973393	237889	73827	73831	5	10	0.00308794	0.796	0.032644	1
DMR_20	chr1	247681102	247681931	829	*	-0.173222	1.73222	39371	12084	12093	10	10	0.00280382	0.8	0.00708806	0.968
DMR_21	chr1	247802703	247803166	463	*	-0.187193	1.49755	39395	12094	12101	8	8	0.00308794	0.812	0.0105498	0.988
DMR_22	chr2	27712902	27713158	256	*	-0.186734	1.30714	209643	66802	66808	7	15	0.00341692	0.836	0.0154023	1
DMR_23	chr6	74104137	74105065	928	*	-0.163566	1.63566	340363	106589	106598	10	15	0.00345431	0.856	0.00828436	0.98
DMR_24	chr5	191292	192103	811	*	-0.145249	1.59774	306384	92800	92810	11	13	0.00364871	0.864	0.00874793	0.984
DMR_25	chr1	78511235	78512129	894	*	-0.12582	1.50984	18287	5374	5385	12	12	0.00403003	0.876	0.0102882	0.988
DMR_26	chr11	67383377	67384040	663	*	-0.174307	1.39446	72195	22109	22116	8	8	0.00415713	0.888	0.0129873	0.996
DMR_27	chr3	142608218	142608898	680	*	-0.177404	1.24183	281611	86322	86328	7	19	0.00426929	0.888	0.0175407	1
DMR_28	chr6	33560953	33561264	311	*	-0.176855	1.23798	335451	105301	105307	7	8	0.00430667	0.888	0.0176902	1
DMR_29	chr18	23713595	23714084	489	*	-0.168148	1.51333	182617	57161	57169	9	10	0.00414966	0.9	0.0102283	0.988
DMR_30	chr2	223916148	223916912	764	*	-0.145173	1.45173	232811	72956	72965	10	10	0.00503193	0.932	0.0115069	0.988
DMR_31	chr15	89960104	89960743	639	*	-0.170336	0.851678	140503	43131	43135	5	9	0.00610859	0.94	0.0436349	1
DMR_32	chr4	155702220	155702760	540	*	-0.154498	1.39048	303257	91997	92005	9	12	0.00573475	0.948	0.013092	0.996
DMR_33	chr3	182817190	182817584	394	*	-0.124106	1.36516	285494	87316	87326	11	11	0.00603383	0.948	0.0137724	1
DMR_34	chr5	140529499	140530606	1107	*	0.113748	1.36497	321500	96908	96919	12	12	0.00540577	0.956	0.0137724	1
DMR_35	chr14	24779959	24780825	866	*	-0.110956	1.33147	115909	35363	35374	12	15	0.00583195	0.956	0.0146546	1
DMR_36	chr16	68270129	68271177	1048	*	-0.10298	1.33874	154000	47766	47778	13	13	0.00541325	0.96	0.0144453	1
DMR_37	chr10	530635	531320	685	*	0.163146	1.14203	39694	12200	12206	7	11	0.00631795	0.96	0.0215782	1
DMR_38	chr8	22132665	22133076	411	*	-0.134172	1.34172	376450	115372	115381	10	14	0.00658711	0.964	0.014378	1
DMR_39	chr22	30476089	30476829	740	*	-0.0994694	1.2931	257700	79248	79260	13	13	0.005817	0.964	0.0158958	1
DMR_40	chr7	27143235	27143806	571	*	0.130214	1.30214	356162	110181	110190	10	19	0.00732732	0.976	0.0155369	1
DMR_41	chr1	68512539	68513063	524	*	-0.153025	1.2242	17631	5129	5136	8	9	0.00732732	0.984	0.0182136	1
DMR_42	chr7	27225733	27226329	596	*	-0.151165	1.20932	356242	110408	110415	8	35	0.00780584	0.984	0.0188492	1
DMR_43	chr10	134150451	134150760	309	*	0.148587	1.18869	59526	16963	16970	8	11	0.00822455	0.984	0.0195445	1
DMR_44	chr5	140683196	140683772	576	*	-0.155839	1.09087	321552	96940	96946	7	11	0.00766378	0.984	0.0242549	1
DMR_45	chr5	140792511	140792700	189	*	-0.154369	1.08059	321617	97019	97025	7	9	0.00806005	0.988	0.0249204	1
DMR_46	chr6	34482278	34482679	401	*	-0.151317	1.05922	335806	105397	105403	7	10	0.00886008	0.992	0.0262139	1
DMR_47	chr8	144120106	144120681	575	*	-0.13526	1.21734	391266	118538	118546	9	9	0.00934607	0.996	0.0185127	1
DMR_48	chr8	95962078	95962463	385	*	-0.139854	1.11884	384348	117390	117397	8	15	0.0106919	0.996	0.0227446	1
DMR_49	chr2	26401598	26402318	720	*	-0.137021	1.09617	209174	66507	66514	8	8	0.0115069	0.996	0.0239559	1
DMR_50	chr4	99850885	99851211	326	*	-0.145722	1.02005	298818	90721	90727	7	20	0.0104601	0.996	0.0289579	1
DMR_51	chr3	169530621	169530920	299	*	-0.143938	1.00757	284033	87020	87026	7	13	0.0110957	0.996	0.0300196	1
DMR_52	chr4	24796919	24797176	257	*	-0.143705	1.00594	293113	89132	89138	7	10	0.0111779	0.996	0.0301093	1
DMR_53	chr19	11784514	11785188	674	*	-0.111133	1.11133	193436	60070	60079	10	11	0.0116639	1	0.0231334	1
DMR_54	chr5	110062343	110062780	437	*	0.121067	1.0896	317311	95201	95209	9	9	0.0135855	1	0.0243447	1
DMR_55	chr10	125033770	125034591	821	*	-0.116897	1.05208	57547	16613	16621	9	10	0.0153201	1	0.0266924	1
DMR_56	chr3	122640625	122641316	691	*	-0.127735	1.02188	278072	85275	85282	8	8	0.0152677	1	0.0287934	1
DMR_57	chr17	17109640	17110295	655	*	0.0899729	0.989702	164571	50849	50859	11	11	0.0124265	1	0.031328	1
DMR_58	chr4	4863874	4864532	658	*	-0.0972233	0.972233	290510	88684	88693	10	15	0.0161799	1	0.0327187	1
DMR_59	chr12	54070891	54071264	373	*	-0.107111	0.963995	91258	27954	27962	9	21	0.0196043	1	0.0334739	1
DMR_60	chr6	29595002	29595506	504	*	-0.106695	0.960255	333785	100333	100341	9	11	0.0197912	1	0.0338104	1
DMR_61	chr11	64739436	64739852	416	*	-0.119885	0.959078	70936	21247	21254	8	13	0.0193426	1	0.0339076	1
DMR_62	chr10	81967195	81967666	471	*	-0.132415	0.926907	50800	14505	14511	7	9	0.015978	1	0.0366516	1
DMR_63	chr6	149806273	149806659	386	*	-0.131444	0.920108	347454	108461	108467	7	11	0.016494	1	0.0371974	1
DMR_64	chr17	5019611	5019989	378	*	-0.14677	0.880623	162054	49736	49741	6	10	0.0117312	1	0.0409059	1
DMR_65	chr3	158390329	158390671	342	*	-0.109635	0.877082	283316	86793	86800	8	12	0.026341	1	0.0411975	1
DMR_66	chr10	135202522	135203200	678	*	-0.108503	0.868028	60252	17141	17148	8	8	0.027141	1	0.0421171	1
DMR_67	chr19	57742260	57742444	184	*	-0.122875	0.860123	204189	65316	65322	7	12	0.021638	1	0.0427228	1
DMR_68	chr10	131567108	131567980	872	*	0.107386	0.859089	58862	16822	16829	8	13	0.0278513	1	0.04282	1
DMR_69	chr18	49865488	49866097	609	*	-0.0954324	0.858892	184935	57749	57757	9	16	0.0256456	1	0.0428349	1
DMR_70	chr8	16859045	16859872	827	*	-0.0856684	0.856684	375516	115151	115160	10	12	0.0189987	1	0.0430891	1
DMR_71	chr1	248855188	248855545	357	*	-0.141959	0.851752	39487	12112	12117	6	8	0.0137275	1	0.0436349	1
DMR_72	chr2	198649767	198650215	448	*	-0.0935437	0.841893	229230	71885	71893	9	10	0.0266101	1	0.0446967	1
DMR_73	chr8	101118377	101118843	466	*	-0.120132	0.840923	384991	117579	117585	7	13	0.0236792	1	0.044764	1
DMR_74	chr7	117067416	117067752	336	*	-0.139401	0.836403	366448	113204	113209	6	10	0.0149462	1	0.0451303	1
DMR_75	chr1	180922636	180923847	1211	*	-0.117046	0.819323	29070	9679	9685	7	9	0.0261391	1	0.0472537	1
DMR_76	chr4	1243849	1244086	237	*	0.136316	0.817893	289193	88368	88373	6	9	0.0165463	1	0.0473883	1
DMR_77	chr5	140743780	140743927	147	*	0.13617	0.817022	321586	96992	96997	6	10	0.0166285	1	0.0475005	1
DMR_78	chr13	76444798	76445108	310	*	-0.100772	0.806174	110118	33839	33846	8	9	0.0333244	1	0.0488089	1
DMR_79	chr16	419916	420255	339	*	0.115137	0.805962	143101	43812	43818	7	12	0.0277317	1	0.0488388	1

## Sheet: MCI vs CN
	seqnames	start	end	width	strand	value	area	cluster	indexStart	indexEnd	L	clusterL	p.value	fwer	p.valueArea	fwerArea
DMR_1	chr20	36148264	36149750	1486	*	-0.0902208	3.42839	242870	75380	75417	38	41	7.40198e-06	0.004	0.000310883	0.168
DMR_2	chr6	29648161	29649084	923	*	0.234675	5.16284	333825	100382	100403	22	22	1.4804e-05	0.008	1.4804e-05	0.008
DMR_3	chr20	57427412	57427977	565	*	-0.0898702	1.61766	247415	76665	76682	18	56	0.000903041	0.416	0.00421173	0.884
DMR_4	chr11	67383377	67384040	663	*	-0.166017	1.32814	72195	22109	22116	8	8	0.00174687	0.616	0.00749821	0.976
DMR_5	chr1	205818956	205819609	653	*	-0.142692	1.42692	32597	10495	10504	10	11	0.00236863	0.748	0.0059734	0.952
DMR_6	chr5	135415693	135416613	920	*	0.11207	1.45691	320430	96447	96459	13	13	0.002228	0.772	0.00564771	0.936
DMR_7	chr2	183943175	183943698	523	*	0.137266	1.37266	228113	71482	71491	10	10	0.00273133	0.8	0.00675801	0.976
DMR_8	chr19	57742217	57742444	227	*	-0.14513	1.16104	204189	65315	65322	8	12	0.00323466	0.84	0.0111622	0.996
DMR_9	chr10	135202522	135203200	678	*	-0.135172	1.08137	60252	17141	17148	8	8	0.00444859	0.912	0.0135604	1
DMR_10	chr2	220107847	220108496	649	*	-0.134521	1.07617	232255	72706	72713	8	8	0.00457442	0.916	0.0137973	1
DMR_11	chr15	101084980	101085111	131	*	-0.140388	0.701942	142486	43663	43667	5	8	0.00502594	0.928	0.0402668	1
DMR_12	chr17	17109640	17110295	655	*	0.107215	1.17937	164571	50849	50859	11	11	0.00472246	0.944	0.0106737	0.996
DMR_13	chr21	33765513	33765751	238	*	0.13412	0.804721	250695	77404	77409	6	12	0.00581796	0.948	0.0295191	1
DMR_14	chr3	195489708	195490309	601	*	-0.125111	1.00089	288065	87929	87936	8	8	0.0063657	0.96	0.0167285	1
DMR_15	chr1	162467080	162467441	361	*	0.135539	0.677695	26588	8930	8934	5	14	0.00607702	0.964	0.0432128	1
DMR_16	chr22	31317914	31318546	632	*	-0.118246	1.06421	257983	79360	79368	9	11	0.00662477	0.968	0.0141378	1
DMR_17	chr5	8457356	8458089	733	*	-0.115268	1.03741	308300	93065	93073	9	10	0.00717252	0.976	0.0151148	1
DMR_18	chr17	36997420	36997740	320	*	0.119317	0.954537	168072	52143	52150	8	10	0.00782389	0.988	0.0188084	1
DMR_19	chr16	419916	420255	339	*	0.120661	0.844624	143101	43812	43818	7	12	0.00845306	0.988	0.026092	1
DMR_20	chr19	37825009	37825572	563	*	-0.097464	0.97464	198114	62280	62289	10	10	0.00894159	0.992	0.0177499	1
DMR_21	chr15	101389272	101390023	751	*	0.0960641	0.960641	142566	43683	43692	10	13	0.00927468	0.992	0.0184383	1
DMR_22	chr6	28601312	28601519	207	*	-0.0908466	0.908466	333541	99930	99939	10	11	0.0109401	0.996	0.0217322	1
DMR_23	chr19	11784514	11785188	674	*	-0.0857891	0.857891	193436	60070	60079	10	11	0.0127314	0.996	0.0251149	1
DMR_24	chr6	31275551	31275881	330	*	0.0851542	0.851542	334459	101974	101983	10	12	0.0129979	0.996	0.0256034	1
DMR_25	chr6	34482278	34482679	401	*	-0.105143	0.736004	335806	105397	105403	7	10	0.0159143	0.996	0.0362697	1
DMR_26	chr1	42383900	42384564	664	*	0.0989995	0.890996	12934	3618	3626	9	9	0.0124945	1	0.0227611	1
DMR_27	chr1	247681242	247681931	689	*	-0.0978781	0.880903	39371	12085	12093	9	10	0.0129831	1	0.0234865	1
DMR_28	chr16	2907517	2908219	702	*	0.0899019	0.809117	144766	44548	44556	9	9	0.0170097	1	0.0291416	1
DMR_29	chr21	37915044	37915354	310	*	-0.0841044	0.75694	251562	77723	77731	9	10	0.0203554	1	0.0339233	1
DMR_30	chr6	152125861	152126938	1077	*	-0.0695698	0.695698	347912	108630	108639	10	10	0.0186678	1	0.041155	1
DMR_31	chr5	68628431	68628856	425	*	0.0987184	0.691029	313621	94270	94276	7	8	0.0205553	1	0.0417546	1
DMR_32	chr3	133502564	133502952	388	*	0.0806391	0.645113	280364	85884	85891	8	10	0.0323615	1	0.0474319	1
DMR_33	chr4	1107487	1107720	233	*	-0.0911469	0.638028	289104	88314	88320	7	10	0.0280165	1	0.0484608	1
DMR_34	chr7	27143235	27143717	482	*	0.0789256	0.631405	356162	110181	110188	8	19	0.0339455	1	0.0495192	1
DMR_35	chr6	30079155	30079280	125	*	-0.104832	0.628994	333965	100706	100711	6	9	0.0189639	1	0.049956	1

## Sheet: AD vs MCI
	seqnames	start	end	width	strand	value	area	cluster	indexStart	indexEnd	L	clusterL	p.value	fwer	p.valueArea	fwerArea
DMR_1	chr1	205818956	205819609	653	*	-0.37326	3.7326	32597	10495	10504	10	11	9.11383e-05	0.048	0.000615184	0.276
DMR_2	chr6	29648161	29649084	923	*	-0.182484	4.01464	333825	100382	100403	22	22	0.000258225	0.136	0.000478476	0.228
DMR_3	chr6	31650735	31651411	676	*	-0.161306	2.58089	334614	102417	102432	16	17	0.000425312	0.22	0.00208099	0.692
DMR_4	chr5	178986291	178986906	615	*	-0.192293	2.49981	327950	98604	98616	13	13	0.000622779	0.296	0.00227086	0.72
DMR_5	chr12	130821962	130822674	712	*	-0.218924	1.97031	102986	31935	31943	9	10	0.00122277	0.5	0.00474679	0.916
DMR_6	chr1	180922636	180923683	1047	*	-0.225818	1.35491	29070	9679	9684	6	9	0.00137467	0.524	0.0140505	1
DMR_7	chr4	99850587	99851211	624	*	-0.194458	1.94458	298818	90718	90727	10	20	0.00169365	0.644	0.00491387	0.924
DMR_8	chr1	110283223	110283342	119	*	-0.214144	0.856577	21161	6428	6431	4	8	0.00192909	0.66	0.0442097	1
DMR_9	chr6	49681178	49681851	673	*	-0.151103	1.81323	338929	106302	106313	12	12	0.00224048	0.736	0.0059164	0.964
DMR_10	chr1	223566447	223567002	555	*	-0.193964	1.55171	35152	11086	11093	8	11	0.00245314	0.756	0.00937206	0.988
DMR_11	chr6	31148332	31148666	334	*	-0.111487	1.56081	334436	101946	101959	14	14	0.00275693	0.796	0.00918219	0.988
DMR_12	chr19	13875014	13875329	315	*	-0.189641	1.32748	194003	60517	60523	7	12	0.00287086	0.8	0.0147492	1
DMR_13	chr4	1243849	1244086	237	*	0.191613	1.14968	289193	88368	88373	6	9	0.00306073	0.816	0.0218276	1
DMR_14	chr1	75198211	75199177	966	*	-0.109349	1.53088	17959	5265	5278	14	14	0.00291643	0.824	0.00978218	0.996
DMR_15	chr10	124638756	124639221	465	*	-0.148018	1.6282	57469	16540	16550	11	13	0.00329617	0.84	0.00808093	0.988
DMR_16	chr6	28601271	28601519	248	*	-0.147891	1.6268	333541	99929	99939	11	11	0.00330376	0.84	0.00808853	0.988
DMR_17	chr8	101348359	101348747	388	*	0.171739	1.37391	385044	117610	117617	8	9	0.00424553	0.908	0.0134505	1
DMR_18	chr5	135415693	135416613	920	*	0.102523	1.3328	320430	96447	96459	13	13	0.00533159	0.936	0.0145745	1
DMR_19	chr2	27712902	27713158	256	*	-0.169787	1.18851	209643	66802	66808	7	15	0.00503539	0.94	0.0201492	1
DMR_20	chr3	142608218	142608898	680	*	-0.161756	1.13229	281611	86322	86328	7	19	0.00638728	0.968	0.0227238	1
DMR_21	chr4	155702172	155702760	588	*	-0.134037	1.34037	303257	91996	92005	10	12	0.00658474	0.972	0.0144226	1
DMR_22	chr2	183943175	183943698	523	*	-0.128487	1.28487	228113	71482	71491	10	10	0.00750372	0.976	0.0160783	1
DMR_23	chr2	26401598	26402203	605	*	-0.159777	1.11844	209174	66507	66513	7	8	0.00674424	0.976	0.0233922	1
DMR_24	chr10	77542423	77542585	162	*	0.163351	0.980105	49905	14402	14407	6	8	0.00690373	0.976	0.0326959	1
DMR_25	chr18	23713595	23714084	489	*	-0.14436	1.29924	182617	57161	57169	9	10	0.0070936	0.98	0.0155543	1
DMR_26	chr17	33759512	33760308	796	*	0.103539	1.13893	167333	51848	51858	11	16	0.00972902	0.992	0.0223896	1
DMR_27	chr10	530635	531320	685	*	0.143076	1.00153	39694	12200	12206	7	11	0.011172	0.992	0.0310782	1
DMR_28	chr22	37098833	37099259	426	*	-0.165322	0.826612	259079	79633	79637	5	15	0.00728347	0.992	0.0475362	1
DMR_29	chr6	28129359	28129656	297	*	0.135168	0.946174	333418	99750	99756	7	8	0.0146125	0.996	0.0354756	1
DMR_30	chr3	64210991	64211464	473	*	-0.147111	0.882666	273621	84263	84268	6	8	0.0114682	0.996	0.0414755	1
DMR_31	chr3	122640935	122641316	381	*	-0.137725	0.826353	278072	85277	85282	6	8	0.0157517	0.996	0.0475666	1
DMR_32	chr21	35831954	35832204	250	*	-0.126504	1.13853	251156	77633	77641	9	16	0.0115138	1	0.0224048	1
DMR_33	chr6	29595002	29595661	659	*	-0.101656	1.11822	333785	100333	100343	11	11	0.0101164	1	0.0233922	1
DMR_34	chr5	140529627	140530606	979	*	0.0993887	1.09328	321500	96909	96919	11	12	0.0106784	1	0.0248656	1
DMR_35	chr19	58220370	58220955	585	*	0.120624	1.08561	204302	65507	65515	9	11	0.0136252	1	0.0253061	1
DMR_36	chr10	134150451	134150760	309	*	0.125396	1.00317	59526	16963	16970	8	11	0.0162758	1	0.0309718	1
DMR_37	chr5	140792511	140792814	303	*	-0.124716	0.997727	321617	97019	97026	8	9	0.0165188	1	0.0314047	1
DMR_38	chr6	48036212	48036676	464	*	-0.0895025	0.984527	338862	106276	106286	11	11	0.012767	1	0.0322782	1
DMR_39	chr18	30352297	30353289	992	*	-0.109024	0.98122	183051	57267	57275	9	9	0.018577	1	0.0326199	1
DMR_40	chr1	247802703	247803166	463	*	-0.122042	0.976333	39395	12094	12101	8	8	0.0180758	1	0.0329009	1
DMR_41	chr22	30476089	30476525	436	*	-0.0882171	0.970388	257700	79248	79258	11	13	0.0129568	1	0.0333794	1
DMR_42	chr1	161008127	161008920	793	*	-0.0961905	0.961905	26241	8720	8729	10	10	0.016777	1	0.0340857	1
DMR_43	chr6	33560953	33561264	311	*	-0.134121	0.938846	335451	105301	105307	7	8	0.0150606	1	0.0361363	1
DMR_44	chr6	28058724	28058973	249	*	0.131792	0.922544	333401	99725	99731	7	8	0.0163289	1	0.0378376	1
DMR_45	chr19	44324898	44325139	241	*	-0.112525	0.9002	199976	63245	63252	8	11	0.0237719	1	0.0397439	1
DMR_46	chr6	74104354	74104877	523	*	-0.111294	0.890352	340363	106590	106597	8	15	0.0247061	1	0.0406097	1
DMR_47	chr17	36997420	36997740	320	*	-0.109907	0.879258	168072	52143	52150	8	10	0.0257542	1	0.0418781	1
DMR_48	chr19	51487229	51487506	277	*	-0.0854591	0.854591	202580	64535	64544	10	13	0.0196631	1	0.0444831	1
DMR_49	chr4	4864110	4864711	601	*	-0.0934229	0.840806	290510	88687	88695	9	15	0.0271592	1	0.0458578	1
DMR_50	chr1	59043070	59043370	300	*	0.118197	0.827379	16254	4809	4815	7	13	0.0250099	1	0.0474679	1
DMR_51	chr16	75150456	75150880	424	*	-0.10147	0.811764	155527	48319	48326	8	8	0.0327718	1	0.0491539	1
