# Supplementary material for: Longitudinal data in peripheral blood confirm that PM20D1 is a quantitative trait locus (QTL) for Alzheimer’s disease and implicate its dynamic role in disease progression
Source: Clin Epigenetics. 2020 Dec 9;12:189. doi: 10.1186/s13148-020-00984-5 (PMC7724832; doi:10.1186/s13148-020-00984-5)
Supplement: Supplementary file 2 — Additional file 2. Table S2: P values and significant slopes for the regression lines modeled between alternate allelic doses of rs708727/rs960603 and β values for the 10 CpG probes at PM20D1 promoter region in the different diagnosis groups. [file 13148_2020_984_MOESM2_ESM.xlsx]

## Sheet: genotype dosage
		CpG probes
dx groups	variates	cg05841700	cg07157834	cg07533224	cg11965913	cg12898220	cg14159672	cg14893161	cg16334093	cg17178900	cg24503407
control	rs1 p	<2e-16	<2e-16	<2e-16	<2e-16	<2e-16	<2e-16	<2e-16	<2e-16	<2e-16	<2e-16
	rs2 p	0.9091	0.829	0.9639	0.9789	0.823	0.602	0.986	0.855	0.983	0.779
	age p	0.0938	0.274	0.0958	0.0972	0.2237	0.0997	0.083	0.102	0.166	0.133
	sex p	0.3631	0.952	0.6516	0.4241	0.7765	0.4758	0.368	0.747	0.49	0.769
	rs1 slope	0.212455	0.137869	0.23979	0.270387	0.216556	0.266171	0.240107	0.151722	0.217134	0.229193
MCI	rs1 p	<2E-16	<2E-16	<2E-16	<2E-16	<2E-16	<2E-16	<2E-16	<2E-16	<2E-16	<2E-16
	rs2 p	0.5578	0.54	0.76869	0.5335	0.646352	0.5803	0.5688	0.416	0.49581	0.68567
	age p	0.5823	0.924	0.98877	0.6921	0.923133	0.973	0.8625	0.569	0.92539	0.90462
	sex p	0.2775	0.578	0.56748	0.6685	0.713362	0.9007	0.6939	0.643	0.35242	0.47608
	rs1 slope	0.208532	0.143004	0.2357	0.26296	0.220896	0.2544	0.245408	0.159088	0.213924	0.232504
AD	rs1 p	1.99e-07	1.13e-06	2.19e-07	8.03e-08	2.53e-07	1.02e-07	1.46e-07	1.25e-07	3.56e-06	1.4e-07
	rs2 p	0.85	0.953278	0.8449	0.9074	0.9389	0.9676	0.9984	0.72006	0.9165	0.933
	age p	0.128	0.634531	0.1868	0.1891	0.2858	0.2084	0.0992	0.52605	0.3801	0.245
	sex p	0.289	0.091147	0.0376	0.0936	0.0366	0.0315	0.0596	0.0243	0.0293	0.046
	rs1 slope	0.194643	0.143248	0.248891	0.257743	0.241167	0.265434	0.237144	0.165035	0.210786	0.243258
	sex slope	0.03215	0.0409311	0.081735	0.065187	0.080126	0.087449	0.0691996	0.05749	0.082647	0.075161
