# Supplementary material for: Longitudinal data in peripheral blood confirm that PM20D1 is a quantitative trait locus (QTL) for Alzheimer’s disease and implicate its dynamic role in disease progression
Source: Clin Epigenetics. 2020 Dec 9;12:189. doi: 10.1186/s13148-020-00984-5 (PMC7724832; doi:10.1186/s13148-020-00984-5)
Supplement: Supplementary file 3 — Additional file 3. Table S3: P values and significant slopes for the regression lines modeled by linear mixed effect modeling between age or p-tau181 and β values for the 10 CpG probes at PM20D1 promoter region in the different diagnosis groups. [file 13148_2020_984_MOESM3_ESM.xlsx]

## Sheet: age
		CpG probes
dx groups	variates	cg05841700	cg07157834	cg07533224	cg11965913	cg12898220	cg14159672	cg14893161	cg16334093	cg17178900	cg24503407
control	age p	0.173	0.963	0.801343	0.523	0.475	0.4335	0.4948	0.491	0.950477	0.67127
	sex p	0.215	0.586	0.304854	0.159	0.376	0.34086	0.1715	0.533	0.359218	0.3526
	rs1 p	<2E-16	<2E-16	<2E-16	<2E-16	<2E-16	<2E-16	<2E-16	<2E-16	<2E-16	<2E-16
	rs2 p	0.894	0.422	0.665306	0.84	0.42	0.97151	0.9339	0.677	0.540912	0.55011
	rs1 slope	0.209176	0.1277	0.2302	0.262527	0.2109	0.2497	0.2392	0.138	0.2099	0.2234
MCI	age p	0.109675	0.517	0.387	0.2513	0.186	0.66023	0.47822	0.383	0.74405	0.44114
	sex p	0.657407	0.478	0.479	0.5101	0.44	0.62054	0.74823	0.419	0.82106	0.491131
	rs1 p	<2E-16	<2E-16	<2E-16	<2E-16	<2E-16	<2E-16	<2E-16	<2E-16	<2E-16	<2E-16
	rs2 p	0.773111	0.899	0.966	0.8806	0.993	0.98724	0.85198	0.884	0.58221	0.970142
	rs1 slope	0.224573	0.1486	0.2565	0.284824	0.237	0.2738	0.2676	0.1578	0.2329	0.2503
AD	age p	0.0493	0.21996	0.04083	0.0308	0.1488	0.0744	0.00638	0.1176	0.1666	0.0632
	sex p	0.1444	0.06467	0.00741	0.0793	0.0116	0.0193	0.0506	0.0135	0.0084	0.0253
	rs1 p	2.92e-09	1.25e-08	2.59e-09	3.22e-10	9.07e-09	1.41e-09	5.9e-10	2.05e-09	7.5e-08	1.12e-09
	rs2 p	0.783	0.63673	0.94102	0.8672	0.9185	0.8546	0.98491	0.5716	0.9656	0.7403
	age slope	0.003232	0.001784	0.004746	0.004714	0.003397	0.004191	0.005576	0.002338	0.002942	0.00405
	sex slope	0.042907	0.042382	0.103466	0.066175	0.096633	0.094193	0.06961	0.058901	0.096493	0.08193
	rs1 slope	0.214931	0.161196	0.27923	0.295413	0.267046	0.297641	0.2722	0.177183	0.234596	0.27478
	rs1 slope compared with control p	0.6651	0.169	0.0841	0.3694	0.052722	0.0976	0.1842	0.0739	0.45013	0.1412
all stable	age p	0.2735	0.62	0.19755	0.248	0.812	0.1196	0.0835	0.3996	0.251057	0.25365
	sex p	0.7041	0.192	0.14479	0.48	0.11	0.2423	0.5343	0.0828	0.17088	0.15662
	rs1 p	<2E-16	<2E-16	<2E-16	<2E-16	<2E-16	<2E-16	<2E-16	<2E-16	<2E-16	<2E-16
	rs2 p	0.7509	0.599	0.60973	0.667	0.454	0.7295	0.7733	0.8072	0.778375	0.52848
	rs1 slope	0.235	0.1519	0.2739	0.308	0.2523	0.2956	0.2831	0.1638	0.2427	0.2669
conversion	decreasing slope p	2.649e-05	3.834e-05	0.0005307	0.0004746	0.0014095	0.0007572	0.000515	0.0004279	0.0003558	0.0007141
	increasing slope p	3.88e-05	5.251e-05	0.0008192	0.0004177	0.0006073	0.0007165	0.0006288	0.0002547	7.93e-06	0.0007366
	sex p	0.072605	0.4917	0.0267974	0.0182704	0.0632374	0.0079891	0.027577	0.207244	0.171226	0.041056
	rs1 p	<2E-16	<2E-16	<2E-16	<2E-16	<2E-16	<2E-16	<2E-16	<2E-16	<2E-16	<2E-16
	rs2 p	9.4e-07	2.152e-06	9.162e-07	3.036e-08	5.286e-06	6.3e-07	3.72e-06	6.695e-09	1.518e-05	1.563e-06
	break point	78.06	78.63	79.26	78.51	79.01	78.13	78.65	78.73	78.91	78.72

## Sheet: ptau-181 (plasma)
		CpG probes
dx groups	variates	cg05841700	cg07157834	cg07533224	cg11965913	cg12898220	cg14159672	cg14893161	cg16334093	cg17178900	cg24503407
control	ptau	0.62	0.949	0.6	0.864	0.699	0.869	0.738	0.469	0.299	0.735
	sex	0.231	0.722	0.344	0.186	0.49	0.411	0.189	0.595	0.453	0.424
	rs1	<2E-16	<2E-16	<2E-16	<2E-16	<2E-16	<2E-16	<2E-16	<2E-16	<2E-16	<2E-16
	rs2	0.717	0.464	0.654	0.709	0.538	0.858	0.921	0.613	0.517	0.498
MCI	ptau	0.819	0.315	0.694	0.78767	0.437	0.647	0.366	0.267	0.61	0.829
	sex	0.743	0.592	0.562	0.58812	0.535	0.709	0.811	0.557	0.822	0.588
	rs1	<2E-16	<2E-16	<2E-16	<2E-16	<2E-16	<2E-16	<2E-16	<2E-16	<2E-16	<2E-16
	rs2	0.55	0.76	0.947	0.83023	0.815	0.949	0.837	0.8	0.441	0.876
AD	ptau	0.033	0.274	0.1591	0.0406	0.1716	0.1328	0.299	0.9665	0.031	0.3822
	sex	0.342	0.216	0.0406	0.1826	0.0492	0.0642	0.142	0.0674	0.0222	0.0979
	rs1	1.97e-08	1.48e-08	1.96e-08	3.61e-09	4.19e-08	1.62e-08	9.89e-09	8.17e-09	1.65e-07	7.1e-09
	rs2	0.866	0.326	0.7488	0.8165	0.7106	0.771	0.898	0.421	0.7822	0.5813
all stable	ptau	0.792	0.241	0.674	0.484	0.986	0.744	0.301	0.852	0.668	0.806
	sex	0.897	0.371	0.35	0.664	0.255	0.438	0.81	0.209	0.287	0.345
	rs1	<2E-16	<2E-16	<2E-16	<2E-16	<2E-16	<2E-16	<2E-16	<2E-16	<2E-16	<2E-16
	rs2	0.988	0.881	0.996	0.844	0.959	0.969	0.975	0.805	0.821	0.872
