# Supplementary material for: Longitudinal data in peripheral blood confirm that PM20D1 is a quantitative trait locus (QTL) for Alzheimer’s disease and implicate its dynamic role in disease progression
Source: Clin Epigenetics. 2020 Dec 9;12:189. doi: 10.1186/s13148-020-00984-5 (PMC7724832; doi:10.1186/s13148-020-00984-5)
Supplement: Supplementary file 4 — Additional file 4. Table S4: P values for the regression lines between the β values of the 10 CpG probes and the gene expression of PM20D1. [file 13148_2020_984_MOESM4_ESM.xlsx]

## Sheet: e_beta_corr
		CpG probes
	p	cg05841700	cg07157834	cg07533224	cg11965913	cg12898220	cg14159672	cg14893161	cg16334093	cg17178900	cg24503407
overall fitting	beta	0.0484	0.000715	0.000576	0.0137	0.00028	0.000946	0.00998	0.000258	0.000458	0.001
	rs1	2e-08	2.28e-07	3.62e-07	7.65e-08	2.88e-07	8.63e-07	6.2e-08	1.85e-06	2.89e-07	3.17e-07
	rs2	0.1544	0.14959	0.1606	0.1442	0.16263	0.136425	0.14868	0.123541	0.136152	0.158
	age	0.4478	0.447125	0.544086	0.4671	0.49542	0.532399	0.50387	0.470298	0.518131	0.51
	sex	0.4899	0.398003	0.400664	0.4819	0.39138	0.441973	0.47536	0.382166	0.384826	0.394
	dx	0.7237	0.64242	0.618387	0.7044	0.57598	0.642566	0.65487	0.620687	0.689251	0.609
stratified genotypes of rs1	0	0.00371	0.00109	0.000379	0.00233	0.000365	0.000566	0.00174	0.000648	0.000234	0.00134
	1	0.415	0.178	0.436	0.349	0.358	0.323	0.487	0.181	0.185	0.217
	2	0.656	0.923	0.807	0.568	0.745	0.566	0.9	0.81	0.599	0.911
