# Supplementary material for: Longitudinal data in peripheral blood confirm that PM20D1 is a quantitative trait locus (QTL) for Alzheimer’s disease and implicate its dynamic role in disease progression
Source: Clin Epigenetics. 2020 Dec 9;12:189. doi: 10.1186/s13148-020-00984-5 (PMC7724832; doi:10.1186/s13148-020-00984-5)
Supplement: Supplementary file 6 — Additional file 6. Table S6: P values for the regression lines between the β values of the 8 CpG probes and the gene expression of PM20D1 from the ROSMAP cohort brain samples. [file 13148_2020_984_MOESM6_ESM.xlsx]

## Sheet: ROSMAP_e_beta_corr
		CpG Probes
	p	cg07157834	cg07167872	cg11965913	cg14159672	cg14893161	cg17178900	cg24503407	cg26354017
overall fitting	beta	3.51e-06	4.97e-07	0.00366	6.43e-05	0.02672	0.000108	3.36e-05	0.00103
	rs1	0.24542	0.9019	0.0903	0.422	0.00789	0.008619	0.10487	0.11144
	rs2	0.89432	0.8503	0.96039	0.9814	0.99276	0.853285	0.97451	0.98862
	msex	0.00433	0.0017	0.00298	0.0022	0.00316	0.003806	0.00332	0.00313
	age_death	0.11185	0.0626	0.05156	0.0596	0.05435	0.068294	0.08633	0.06312
	dx	0.11696	0.0561	0.11504	0.1068	0.13666	0.128712	0.12831	0.15501
stratified genotypes of rs1	0	0.00134	0.000981	0.00443	0.00171	0.003	0.00541	0.000272	0.0166
	1	0.00449	0.00177	0.00739	0.00842	0.0496	0.0432	0.00256	0.0158
	2	0.346	0.5013	0.2033	0.0979	0.2834	0.3501	0.7806	0.289
