# Supplementary material for: Longitudinal data in peripheral blood confirm that PM20D1 is a quantitative trait locus (QTL) for Alzheimer’s disease and implicate its dynamic role in disease progression
Source: Clin Epigenetics. 2020 Dec 9;12:189. doi: 10.1186/s13148-020-00984-5 (PMC7724832; doi:10.1186/s13148-020-00984-5)
Supplement: Supplementary file 8 — Additional file 8. Table S8: Mean β values and their standard deviations (SD) at baseline measurements for the sex and age matched samples at the 10 CpG probes stratified by the allelic dose of rs708727. Control and MCI samples were obtained by matching AD samples’ sex and age using ‘matchControls’ command in the R package ‘e1071.’ [file 13148_2020_984_MOESM8_ESM.xlsx]

## Sheet: allele stratified
SNP allelic dosage	dx	# of subjects	CpG probes
			cg05841700		cg07157834		cg07533224		cg11965913		cg12898220		cg14159672		cg14893161		cg16334093		cg17178900		cg24503407
			mean	SD	mean	SD	mean	SD	mean	SD	mean	SD	mean	SD	mean	SD	mean	SD	mean	SD	mean	SD
rs1=0	control	30	0.235032	0.107407	0.636512	0.0921709	0.436938	0.186202	0.231021	0.161372	0.510287	0.179956	0.406992	0.187958	0.312678	0.152047	0.605224	0.0973365	0.410431	0.14517	0.403463	0.160866
	MCI	33	0.208673	0.0940635	0.599991	0.0892473	0.371066	0.167711	0.202201	0.138101	0.444604	0.167533	0.339042	0.158952	0.259716	0.141751	0.561546	0.103038	0.359334	0.127371	0.353595	0.149583
	AD	34	0.206798	0.121443	0.593735	0.111273	0.366995	0.190174	0.198591	0.160753	0.430126	0.193004	0.339449	0.200738	0.255744	0.159202	0.558866	0.127477	0.365747	0.182861	0.343357	0.179985
rs1=1	control	49	0.40708	0.142402	0.754135	0.0923906	0.664395	0.160669	0.485214	0.181692	0.725403	0.153382	0.648448	0.170038	0.523334	0.16917	0.739893	0.100184	0.600472	0.152205	0.625302	0.161834
	MCI	49	0.380734	0.140508	0.737787	0.103074	0.640004	0.161886	0.439222	0.185111	0.699626	0.149202	0.617926	0.171085	0.483859	0.168582	0.718169	0.105273	0.575431	0.15881	0.585127	0.164886
	AD	48	0.385255	0.136232	0.747166	0.102069	0.653364	0.160814	0.464199	0.177563	0.705096	0.151556	0.63031	0.163216	0.496381	0.163717	0.732661	0.101987	0.585993	0.156757	0.599744	0.157026
rs1=2	control	8	0.707427	0.0864623	0.908357	0.0384805	0.916979	0.0491769	0.814572	0.0888477	0.934594	0.046247	0.912991	0.0552994	0.817747	0.085204	0.896742	0.0453451	0.854851	0.0595217	0.87835	0.0674839
	MCI	5	0.597729	0.15625	0.865123	0.0692009	0.830817	0.11129	0.683733	0.191687	0.880299	0.0768535	0.821205	0.138804	0.729961	0.123518	0.859292	0.0595133	0.7682	0.109593	0.805508	0.108954
	AD	5	0.690933	0.0900261	0.908122	0.027093	0.870253	0.0401481	0.746448	0.0860396	0.903994	0.0378713	0.88586	0.0442949	0.785028	0.0903724	0.889254	0.0383936	0.816052	0.0635639	0.857572	0.043525
